# Supplementary material
Source: PubMed Central journal article supplement (PMC8159882)
Supplement: NIHMS1687529-supplement-Supplementary_document.pdf [file NIHMS1687529-supplement-Supplementary_document.pdf]

## Supplementary information

---

# The cellular and functional complexity of thermogenic fat

---

In the format provided by the authors and unedited

### Supplementary Box1: BAT and the developmental lineage

Brown adipose tissue (BAT) is composed of multiple cell types, including thermogenic adipocytes, non-thermogenic adipocytes, progenitors, endothelial cells, fibroblasts, and various immune cells. Most human studies describe “BAT” because the analyses are largely at a tissue level; however, this does not imply the developmental lineage of the tissues.

“Classical” brown adipocyte is a term that originally intended to distinguish its prenatal dermomyotome-origin from the non-dermomyotome-derived recruitable form of thermogenic adipocytes, like beige adipocytes. Thus, “classical” represents its developmental lineage, but not the tissue location nor the cell morphology. For instance, supraclavicular BAT depots in adult humans contain multiple populations of thermogenic adipocytes, including beige adipocytes<sup>1-4</sup>, and the cellular compositions vary depending on the depth within a BAT<sup>5</sup>. Also, the interscapular BAT of mice exhibits “whitened” when mice are acclimated to a thermoneutral condition for a prolonged time, but this morphological change does not alter the developmental lineage<sup>6</sup>.

The existence of beige adipocytes in the subcutaneous WAT of humans was once questioned. This skepticism was partly due to the fact that earlier efforts using <sup>18</sup>F-FDG-PET-CT did not detect active glucose uptake in the subcutaneous WAT. However, a recent work using the high-sensitive <sup>18</sup>F-FDG-PET-CT detected active glucose uptake in human adipose tissues at broad anatomical locations, including the abdominal region<sup>7</sup>. More directly, repeated cold exposure (10 days of a 30-minute cold treatment per day), as well as chronic mirabegron treatment for 10 weeks, potentially increased mitochondrial respiration and beige fat-enriched gene expression (*UCP1* and *TMEM26*) in the subcutaneous WAT of adult humans<sup>8</sup>. Notably, chronic mirabegron treatment in obese human subjects improved insulin sensitivity that showed a significant correlation with increased *UCP1* expression in the subcutaneous WAT, *i.e.*, beige adipocytes in the subcutaneous WAT<sup>9</sup>. Thus, adult humans possess the recruitable, non-dermomyotome-origin beige adipocytes not only in dedicated BAT depots but also in the subcutaneous WAT.

1. Lidell, M.E. *et al.* Evidence for two types of brown adipose tissue in humans. *Nature medicine* **19**, 631-634 (2013).
2. Wu, J. *et al.* Beige adipocytes are a distinct type of thermogenic fat cell in mouse and human. *Cell* **150**, 366-376 (2012).
3. Shinoda, K. *et al.* Genetic and functional characterization of clonally derived adult human brown adipocytes. *Nature medicine* **21**, 389-394 (2015).
4. Sharp, L.Z. *et al.* Human BAT possesses molecular signatures that resemble beige/brite cells. *PloS one* **7**, e49452 (2012).

5. Cypess, A.M. *et al.* Anatomical localization, gene expression profiling and functional characterization of adult human neck brown fat. *Nature medicine* **19**, 635-639 (2013).
6. Kajimura, S. & Spiegelman, B.M. Confounding issues in the "humanized" BAT of mice. *Nat Metab* **2**, 303-304 (2020).
7. Leitner, B.P. *et al.* Mapping of human brown adipose tissue in lean and obese young men. *Proceedings of the National Academy of Sciences of the United States of America* **114**, 8649-8654 (2017).
8. Finlin, B.S. *et al.* Human adipose beiging in response to cold and mirabegron. *JCI Insight* **3** (2018).
9. Finlin, B.S. *et al.* The beta3-adrenergic receptor agonist mirabegron improves glucose homeostasis in obese humans. *The Journal of clinical investigation* (2020).
